# Supplementary material for: Design of broadband transparent electrodes for flexible organic solar cells
Source: Royal Society of Chemistry journal article supplement (doi:10.1039/c2ta00946c), 2013-01-01
Supplement: c2ta00946c.pdf [file c2ta00946c.pdf]

## Supplementary Information

### Design of broadband transparent electrodes for flexible organic solar cells\*\*

Juyoung Ham, Sungjun Kim, Gwan Ho Jung, Wan Jae Dong and Jong-Lam Lee<sup>\*a</sup>

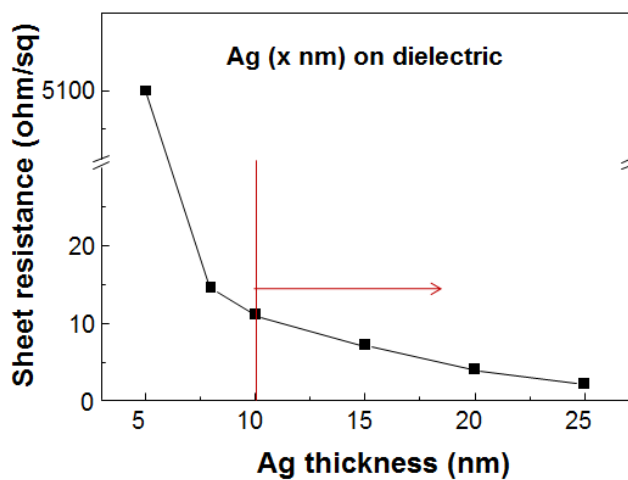

**Figure S1.** Sheet resistances of Ag films of various thickness on dielectrics.

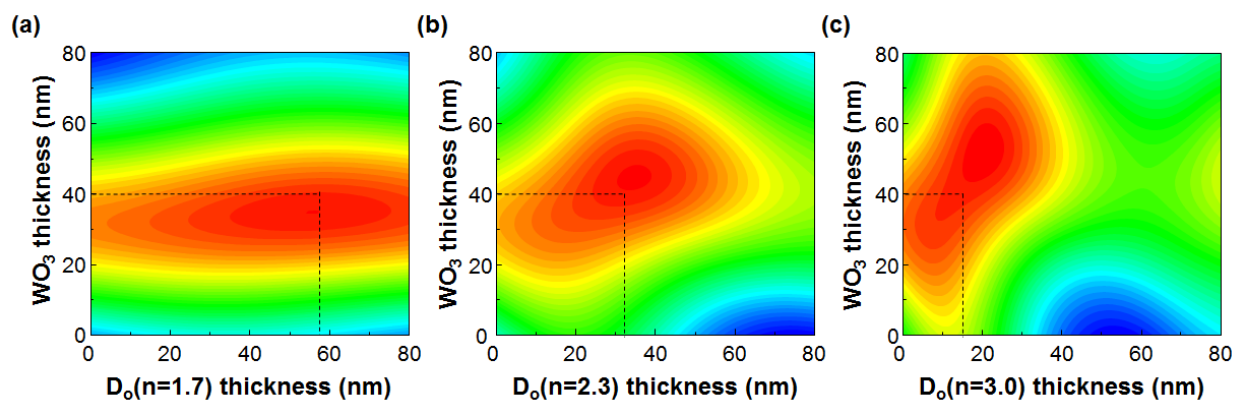

**Figure S2.** Simulated contour plots of average transmittance (400 ~ 700 nm) for  $D_o/Ag/WO_3$  as a function of thickness (a)  $D_o$  ( $n = 1.7$ ,  $k = 0$ ), (b)  $D_o$  ( $n = 2.3$ ,  $k = 0$ ), (c)  $D_o$  ( $n = 3.0$ ,  $k = 0$ ).

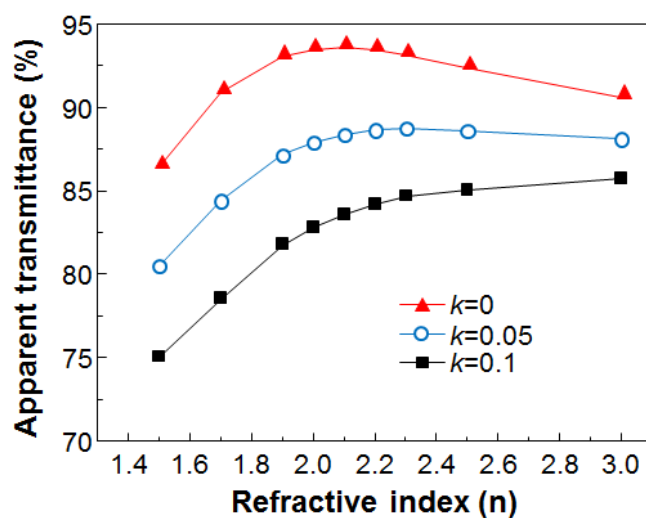

**Figure S3.** Apparent transmittance of  $D_o/Ag/WO_3$  as a function of the refractive index (from 1.5 to 3.0) and extinction coefficient ( $k = 0, 0.05$ , and  $0.1$ ) of outer dielectrics.

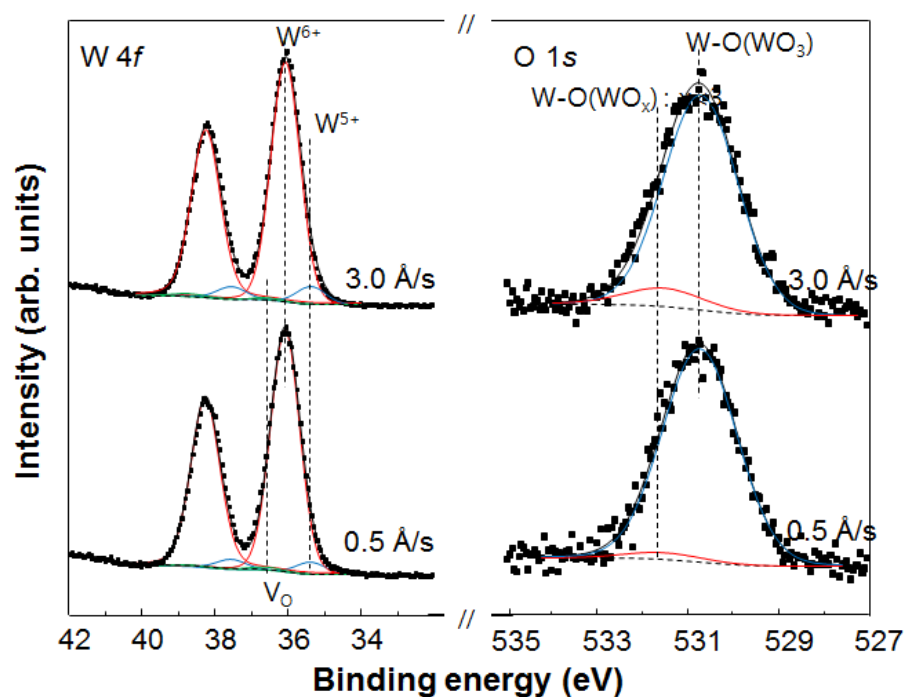

**Figure S4.** W 4*f* and O 1*s* core-level spectra of WO<sub>3-x</sub> films deposited at different rates.

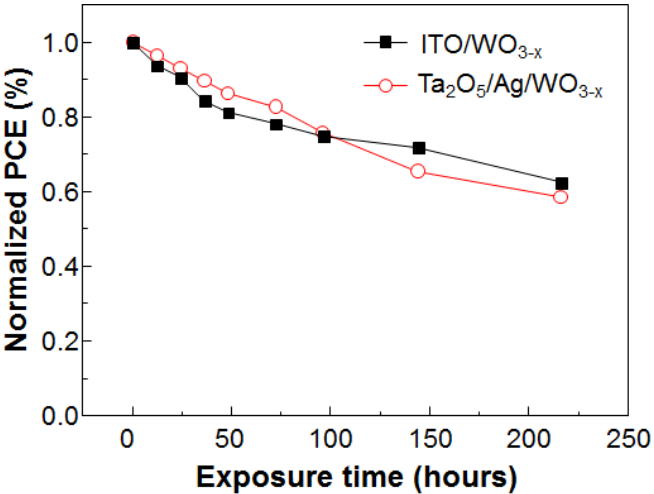

**Figure S5.** Changes in PCE of device using Ta<sub>2</sub>O<sub>5</sub>/Ag/WO<sub>3-x</sub> and ITO/WO<sub>3-x</sub> electrode during exposure to air.
